# Supplementary material
Source: Springer Nature journal article supplement (https://www.springermedizin.de/resource/supplementary/12905_2013_375_MOESM3_ESM.pdf/9518586)
Supplement: MOESM3 [file 9518586]

**Disagree most****Agree most**

| -4 | -3   | -2   | -1  | 0  | +1 | +2 | +3   | +4  |
|----|------|------|-----|----|----|----|------|-----|
| 4  | 25   | 2    | 3** | 1  | 9  | 6  | 16** | 18  |
| 14 | 28   | 10** | 5   | 11 | 23 | 7  | 17   | 31* |
|    | 35** | 12   | 13  | 15 | 32 | 8  | 30*  |     |
|    |      | 24   | 19  | 21 | 33 | 20 |      |     |
|    |      | 27   | 38  | 22 | 36 | 34 |      |     |
|    |      |      | 39  | 26 | 37 |    |      |     |
|    |      |      |     | 29 |    |    |      |     |
